# Supplementary material for: Photolysis of polymeric self-assembly controlled by donor–acceptor interaction
Source: Royal Society of Chemistry journal article supplement (doi:10.1039/c7cc07560j), 2017-01-01
Supplement: c7cc07560j1.pdf [file c7cc07560j1.pdf]

Supporting Information

## **Photolysis of Polymeric Self-Assembly Controlled by Donor- Acceptor Interaction**

Tingjuan Qian,<sup>a</sup> Feiyi Chen,<sup>a</sup> Yulan Chen,<sup>\*a</sup> Yi-Xuan Wang<sup>\*a</sup> and Wenping Hu<sup>a</sup>

<sup>a</sup>Tianjin Key Laboratory of Molecular Optoelectronic Science Department of Chemistry, School of Science, Tianjin University, and Collaborative Innovation Center of Chemical Science and Engineering (Tianjin), Tianjin 300072, P. R. China.

*E-mail: yulan.chen@tju.edu.cn; yx\_wang@tju.edu.cn*

### **Contents**

**Section 1. General information**

**Section 2. Synthesis of An-bOMV**

**Section 3. Characterization of supramolecular assembly**

**Section 4. Characterization of D-A interaction**

**Section 5. Light-induced dissipation**

**Section 6. NMR and Mass spectra of guest molecule**

**Section 7. Supporting References**

## 1. General information

The commercially available reagents and solvents were used as purchased. All yields were given as isolated yields. The pre-irradiated solution, which was bubbled for 30 min by oxygen, was placed in centrifugal tubes (5 mL) and further irradiated using a 300 W Xenon lamp (CEL-HXF300). The regulation of pH is executed by hydrochloric acid and sodium hydroxide.  $^1\text{H}$  NMR (400 MHz),  $^{13}\text{C}$  NMR (100 MHz) and  $^1\text{H}$ - $^1\text{H}$  NOESY spectra were recorded in deuterated solvents on a Bruker ADVANCE 400 at 25 °C.  $^1\text{H}$  NMR spectra recorded in  $\text{D}_2\text{O}$  were referenced to the internal  $\text{CH}_3\text{CN}$  signal at 2.06 ppm. MALDI-TOF mass spectra were recorded on a Bruker New Autoflex Speed LIN Spectrometer using a 337 nm nitrogen laser with dithranol as matrix. UV-vis absorption spectra were obtained on a PerkinElmer Lambda 750 spectrophotometer at 25 °C. Fluorescence spectra were recorded on a Hitachi model F-7000 spectrofluorometer. Atomic force microscopy (AFM) was performed on a Bruker Multimode 8 on the mica sheet. High-resolution electrospray ionization mass spectra (HR-ESI-MS) were recorded on a Bruker mior OTOF-QII spectrometer. The Electrospray Ionization Mass Spectra (EI-MS) were recorded on a SHIMADZU GCMS-QP2010 SE. The cyclic voltammetry experiments were carried out on a CHI660E B14511 electrochemical workstation comprising a platinum carbon working electrode, a Pt coil counter electrode, and a  $\text{Hg}/\text{Hg}_2\text{Cl}_2$  (SCE) reference electrode. The hydrodynamic diameter ( $D_h$ ) was determined by DLS experiments at 25 °C. Solution samples were examined by NanoBrook 173 plus at scattering angle of 90°. Viscometer measurements were carried out on a SCHOTT-Ubbelohde micro capillary viscometer (DIN 53810, 0.40 mm inner diameter) at 30 °C.

## 2. Synthesis of An-bOMV

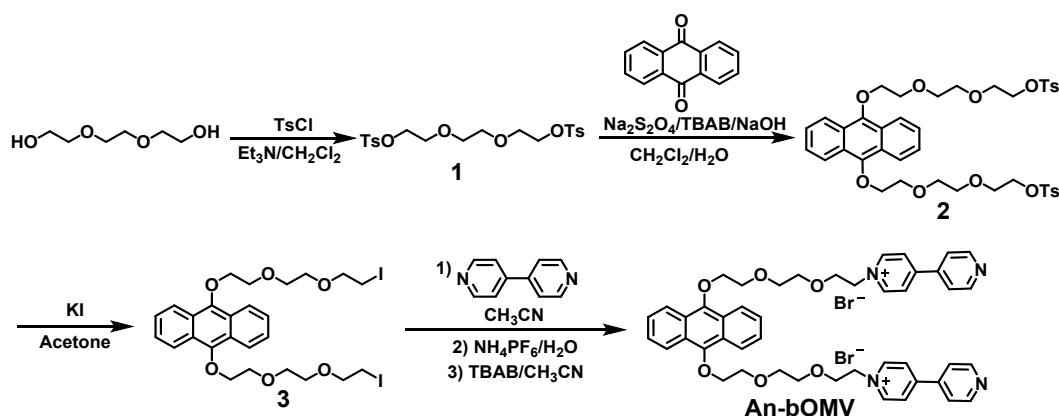

Scheme S1. Synthesis of An-bOMV.

**Synthesis of Compound 1.**<sup>1</sup> A mixture of triethylene glycol (8.0 mL, 0.06 mol), Et<sub>3</sub>N (25.0 mL, 0.18 mol) was dissolved in CH<sub>2</sub>Cl<sub>2</sub> (100 mL). A solution of tosyl chloride (25.0 g, 0.13 mol) in CH<sub>2</sub>Cl<sub>2</sub> (40 mL) was added in portions to this mixture during 1 h under a nitrogen atmosphere. After that, the reaction mixture was stirred overnight at room temperature. It was then washed with saturated NaHCO<sub>3</sub> aqueous solution. The organic phase was dried by MgSO<sub>4</sub> and the solvent was removed via rotary evaporation under reduced pressure. The crude product was purified by column chromatography over silica gel with CH<sub>2</sub>Cl<sub>2</sub>/petroleum ether to afford **1** as a white solid (19.4 g, 71%). <sup>1</sup>H NMR (400 MHz, CDCl<sub>3</sub>): δ 7.72 (d, *J* = 8.0 Hz, 4H), 7.27 (d, *J* = 8.0 Hz, 4H), 4.08–4.06 (m, 4H), 3.60–3.57 (m, 4H), 3.46 (s, 4H), 2.38 (s, 6H).

**Synthesis of Compound 2.**<sup>2</sup> A mixture of compound **1** (13.0 g, 28.5 mmol), 9,10-anthraquinone (1.0 g, 4.8 mmol), and tetrabutylammonium bromide (TBAB) (1.6 g, 4.8 mmol) was dissolved in CH<sub>2</sub>Cl<sub>2</sub> (50 mL) under a nitrogen atmosphere. Then the solution of Na<sub>2</sub>S<sub>2</sub>O<sub>4</sub> (1.7 g, 9.5 mmol) and NaOH (1.9 g, 47.7 mmol) in nitrogen-saturated water (50 mL) was added in portions, and the mixture was stirred under reflux at 40 °C for 5 days. After cooling to room temperature, it was then washed with saturated NaCl aqueous solution, and the organic phase was dried by MgSO<sub>4</sub>. The solvent was removed via rotary evaporation under reduced pressure, and the resulting residue was purified by column chromatography with CH<sub>2</sub>Cl<sub>2</sub>/petroleum ether to yield

**2** (0.7 g, 19%) as a yellow oil.  $^1\text{H}$  NMR (400 MHz,  $\text{CDCl}_3$ ):  $\delta$  8.27 (dd,  $J = 6.4$  Hz, 2.8 Hz, 4H), 7.71 (d,  $J = 8.0$  Hz, 4H), 7.39 (dd,  $J = 6.8$ , 3.2 Hz, 4H), 7.20 (d,  $J = 8.4$  Hz, 4H), 4.29–4.21 (m, 4H), 4.17–4.09 (m, 4H), 3.94–3.85 (m, 4H), 3.72–3.69 (m, 8H), 3.67–3.66 (m, 4H), 2.30 (s, 6H).  $^{13}\text{C}$  NMR (100 MHz,  $\text{CDCl}_3$ ):  $\delta$  146.03, 143.76, 131.91, 128.77, 126.93, 124.31, 124.06, 121.65, 73.75, 69.91, 69.62, 68.28, 67.86, 20.25. MALDI-TOF:  $m/z$  782.243 ( $[\text{M}]^+$ , calcd for  $\text{C}_{40}\text{H}_{46}\text{O}_{12}\text{S}_2^+$ , 782.243).

**Synthesis of Compound 3.**<sup>3</sup> A mixture of compound **2** (0.65 g, 0.83 mmol) and KI (1.4 g, 8.3 mmol) in acetone (60 mL) was heated under reflux in a nitrogen atmosphere for 24 h and evaporated to dryness after cooling. The residue was washed with  $\text{CH}_2\text{Cl}_2$  and saturated  $\text{Na}_2\text{S}_2\text{O}_3$  aqueous solution. The organic phase was dried by  $\text{MgSO}_4$ . The solvent was removed via rotary evaporation under reduced pressure, and the resulting residue was purified by column chromatography with EtOAc/petroleum to yield **3** as a white solid (250 mg, 43%).  $^1\text{H}$  NMR (400 MHz,  $\text{CDCl}_3$ ):  $\delta$  8.30 (dd,  $J = 6.8$ , 3.2 Hz, 4H), 7.41 (dd,  $J = 6.8$ , 3.2 Hz, 4H), 4.44–4.21 (m, 4H), 4.03–3.88 (m, 4H), 3.88–3.62 (m, 12H), 3.23 (t,  $J = 13.6$  Hz, 4H).

**Synthesis of Compound An-bOMV.**<sup>3</sup> A solution of 4,4-bipyridine (2.25 g, 14.4 mmol) in  $\text{CH}_3\text{CN}$  (40 mL) was refluxed under a nitrogen atmosphere. Compound **3** (1.0 g, 1.4 mmol) was added in portions during 3 days, seven times per day (40 mg per portion). The reaction mixture was maintained under reflux for further 48 h, and then was cooled at 4 °C overnight. The precipitate was collected and dissolved in a minimum of water, followed by the addition of excess  $\text{NH}_4\text{PF}_6$  until no further precipitation was observed. The solid was purified by silica gel column chromatography with acetone/ $\text{NH}_4\text{PF}_6$  (aq, 0.25 M). The counterions were exchanged to  $\text{Br}^-$  using tetrabutylammonium bromide to yield **An-bOMV** as a yellow solid (220 mg, 17%).  $^1\text{H}$  NMR (400 MHz,  $\text{DMSO}-d_6$ ):  $\delta$  9.22 (d,  $J = 6.4$  Hz, 4H), 8.64 (d,  $J = 6.0$  Hz, 4H), 8.52 (d,  $J = 6.8$  Hz, 4H), 8.19 (dd,  $J = 6.8$ , 3.2 Hz, 4H), 7.75 (d,  $J = 5.6$  Hz, 4H), 7.45 (dd,  $J = 6.8$ , 3.2 Hz, 4H), 5.08–4.80 (m, 4H), 4.14–4.07 (m, 8H), 3.92–3.62 (m, 12H).  $^{13}\text{C}$  NMR (100 MHz,  $\text{DMSO}-d_6$ ):  $\delta$  152.50, 150.66, 146.42, 145.67,

140.44, 125.56, 124.85, 124.43, 122.30, 121.54, 74.80, 69.71, 68.65, 59.80. HR-ESI-MS:  $m/z$  376.1781 ( $[M-2Br]^{2+}/2$ , calcd for  $C_{46}H_{48}N_4O_6^{2+}/2$ , 376.1784).

### 3. Characterization of supramolecular assembly

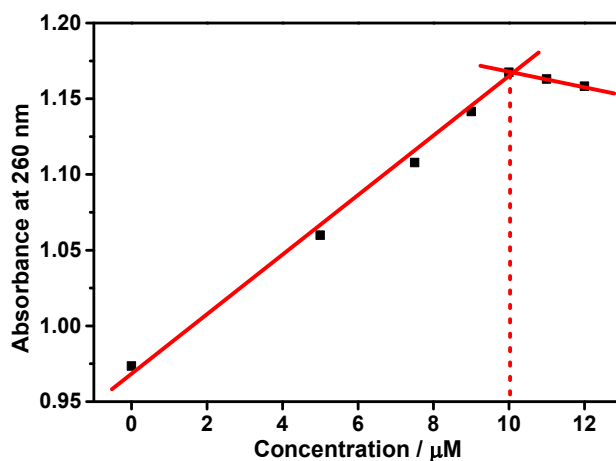

**Figure S1.** Dependence of the absorbance of **An-bOMV** on the increase of **CB[8]** in water. [**An-bOMV**] = 10.0  $\mu\text{M}$ .

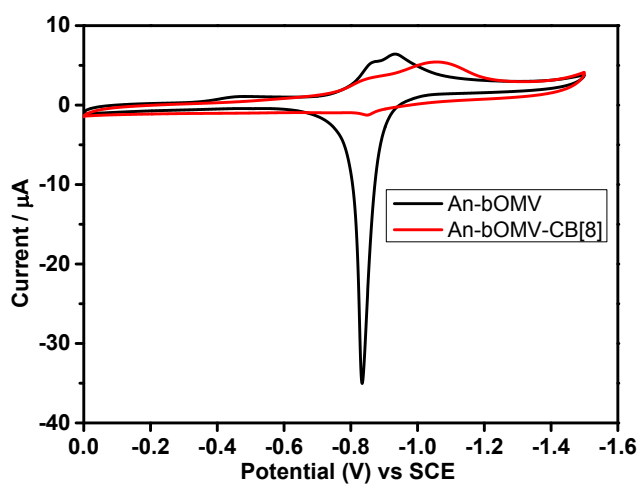

**Figure S2.** Cyclic voltammograms of **An-bOMV** with and without **CB[8]** in phosphate buffer solution (pH 7.0). Scan rate = 100  $\text{mVs}^{-1}$ . [**An-bOMV**] = [**CB[8]**] = 0.1 mM.

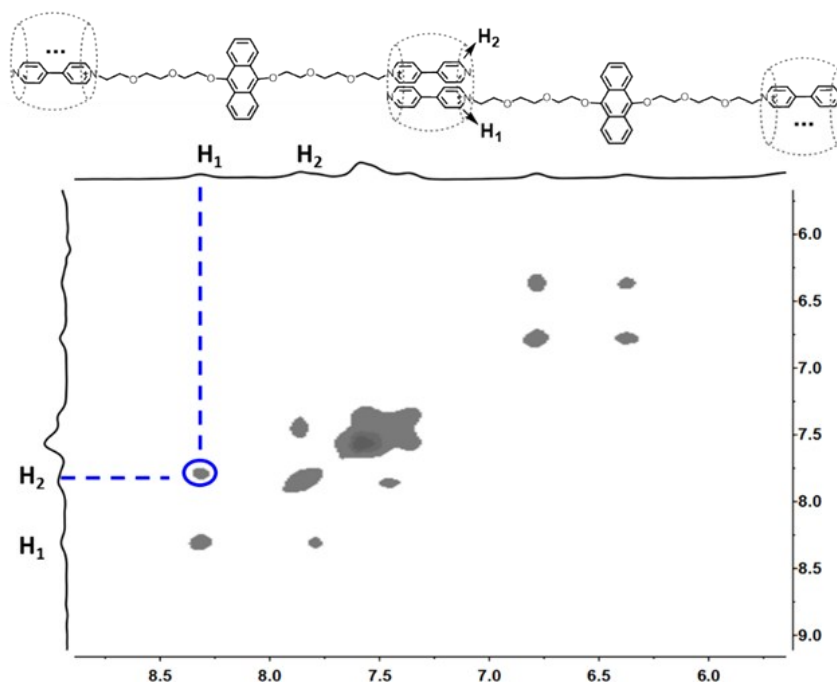

**Figure S3.** Partial  $^1\text{H}$ - $^1\text{H}$  NOESY NMR spectrum of the An-bOMV-CB[8] complex in  $\text{D}_2\text{O}$ .

$[\text{An-bOMV}] = [\text{CB}[8]] = 1.0 \text{ mM}$ .

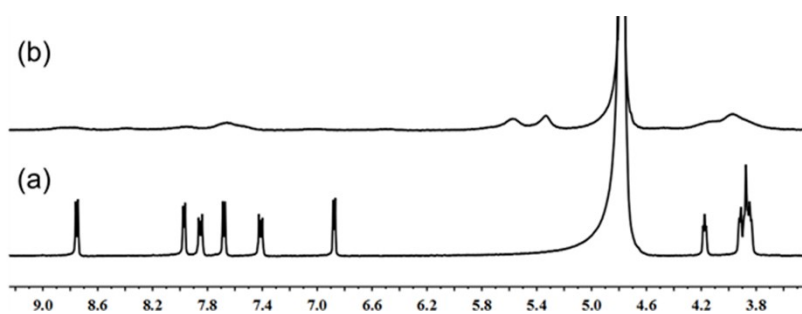

**Figure S4.**  $^1\text{H}$  NMR spectra of (a) An-bOMV and (b) An-bOMV + CB[8] in  $\text{D}_2\text{O}$ .  $[\text{An-bOMV}]$

$= [\text{CB}[8]] = 1.0 \text{ mM}$ .

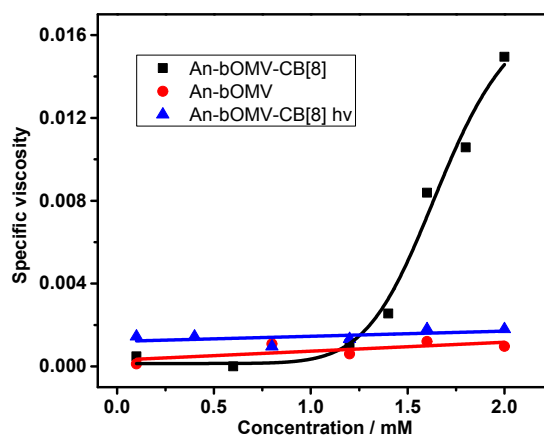

**Figure S5.** Specific viscosity of aqueous solutions of **An-bOMV**, the **An-bOMV-CB[8]** complex, and the **An-bOMV-CB[8]** complex after light irradiation for 2 h.

#### 4. Characterization of D-A interaction

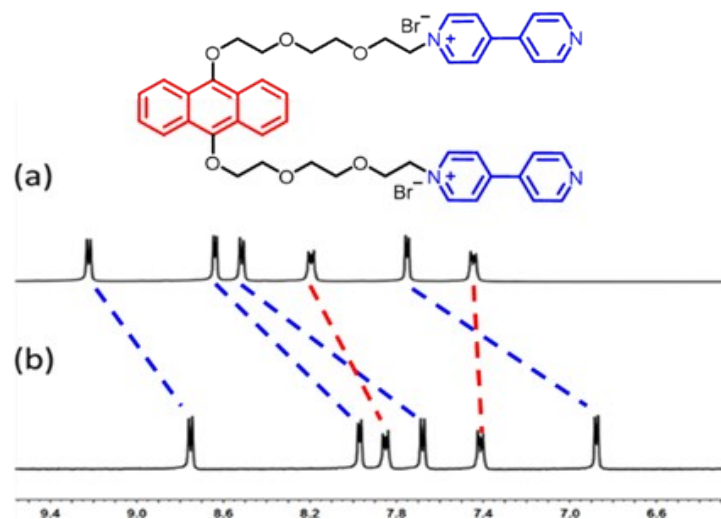

**Figure S6.**  $^1\text{H}$  NMR spectra of (a) **An-bOMV** in  $\text{DMSO-}d_6$  and (b) **An-bOMV** in  $\text{D}_2\text{O}$ .

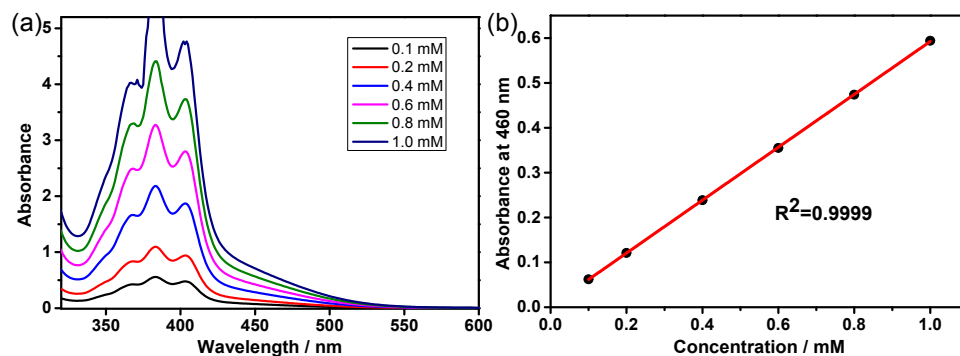

**Figure S7.** (a) UV-vis absorption spectra of **An-bOMV** in water. (b) The linear fitting of absorbance at 460 nm versus concentration.

#### 5. Light-induced dissipation

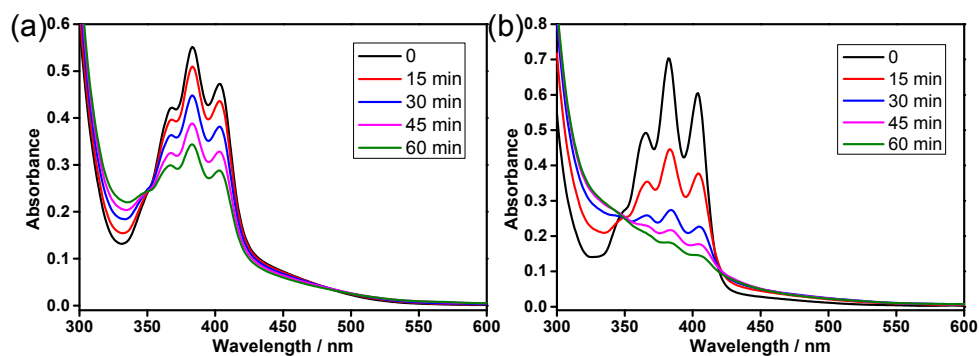

**Figure S8.** UV-vis absorption spectra of (a) **An-bOMV** and (b) **An-bOMV-CB[8]** assembly under irradiation at pH 7.  $[\text{An-bOMV}] = [\text{CB[8]}] = 0.1 \text{ mM}$ .

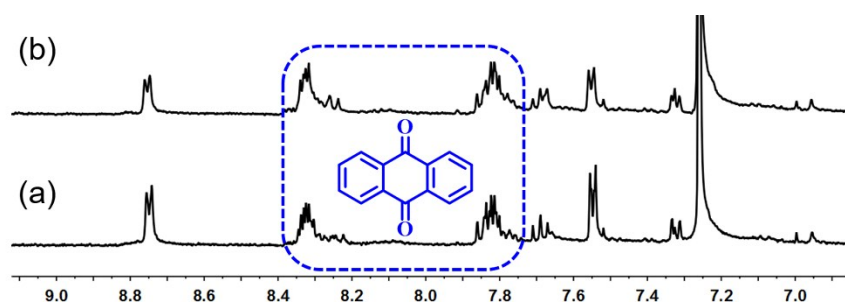

**Figure S9.**  $^1\text{H}$  NMR spectra of the products of (a) **An-bOMV** and (b) **An-bOMV-CB[8]** assembly, in the organic extract phase after irradiation for 2 h in  $\text{CDCl}_3$ .

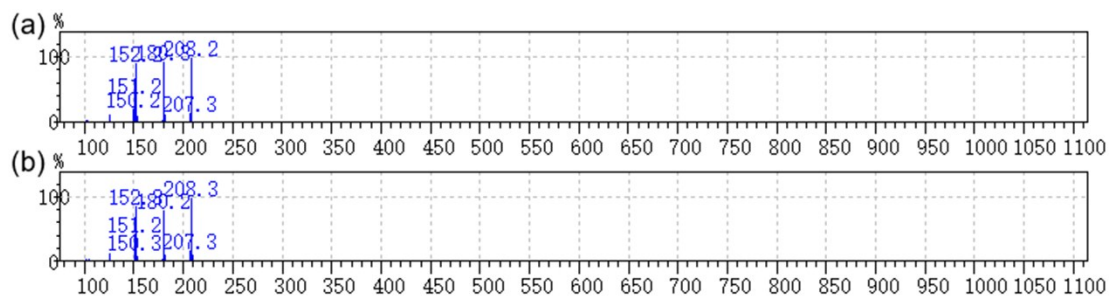

**Figure S10.** EI-MS spectra of the products of (a) **An-bOMV** and (b) **An-bOMV-CB[8]** assembly in the organic extract phase after irradiation for 2 h.



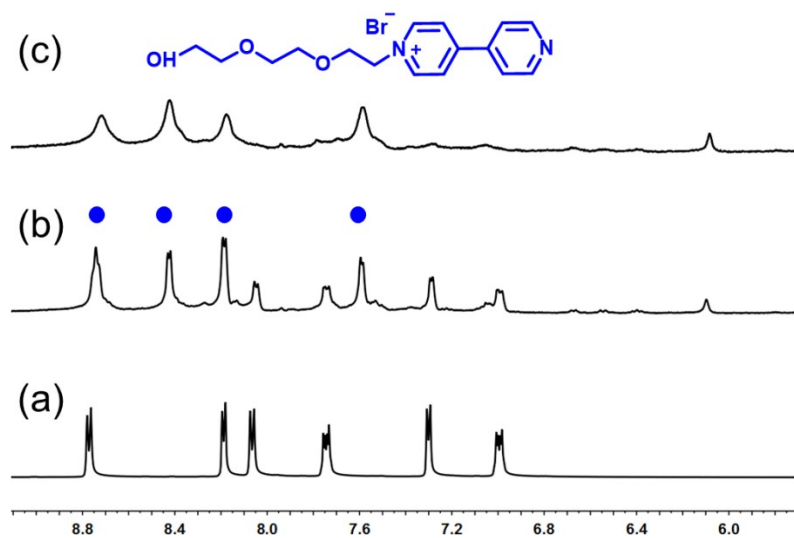

**Figure S11.**  $^1\text{H}$  NMR spectra of (a) **An-bOMV**, and the photolytic products of (b) **An-bOMV** and (c) **An-bOMV-CB[8]** assembly in the water phase after extraction measured in  $\text{DMSO-}d_6$ . The  $\text{MV}^+$  moiety of the resulting alkanol is denoted as symbol ●.

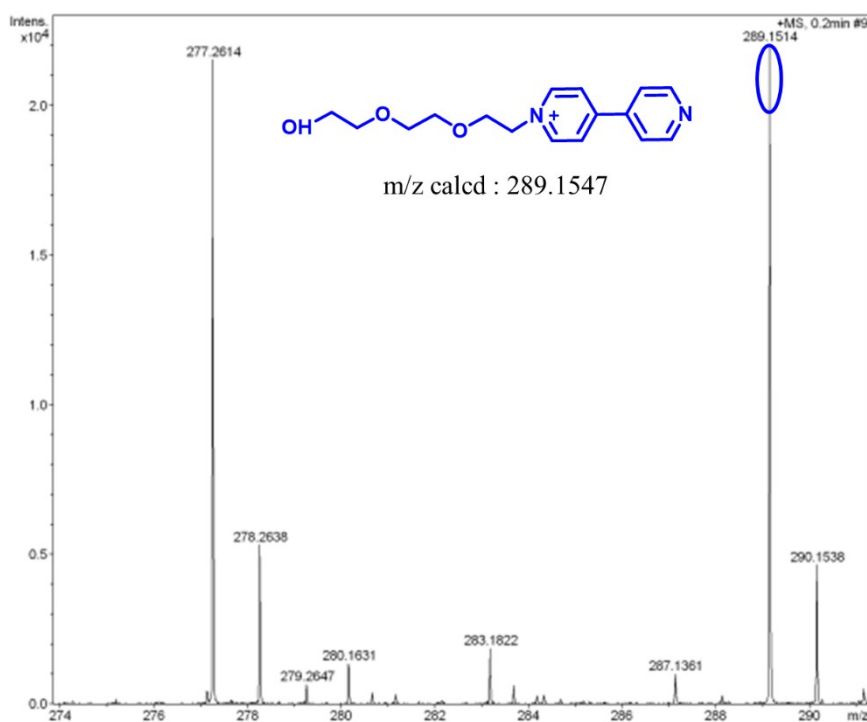

**Figure S12.** HR-ESI-MS spectrum of the photolytic product of **An-bOMV-CB[8]** assembly in the water phase after extraction.

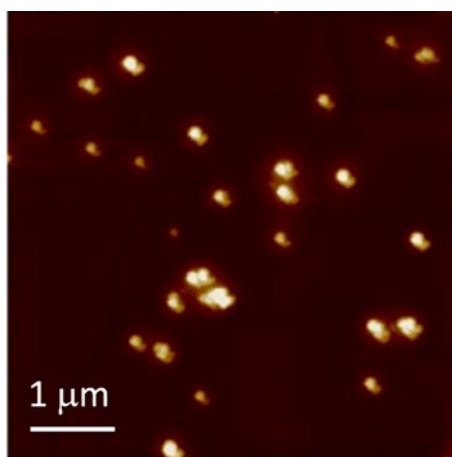

**Figure S13.** AFM image of An-bOMV-CB[8] assembly after irradiation for 2 h.

## 6. NMR and Mass spectra of guest molecule

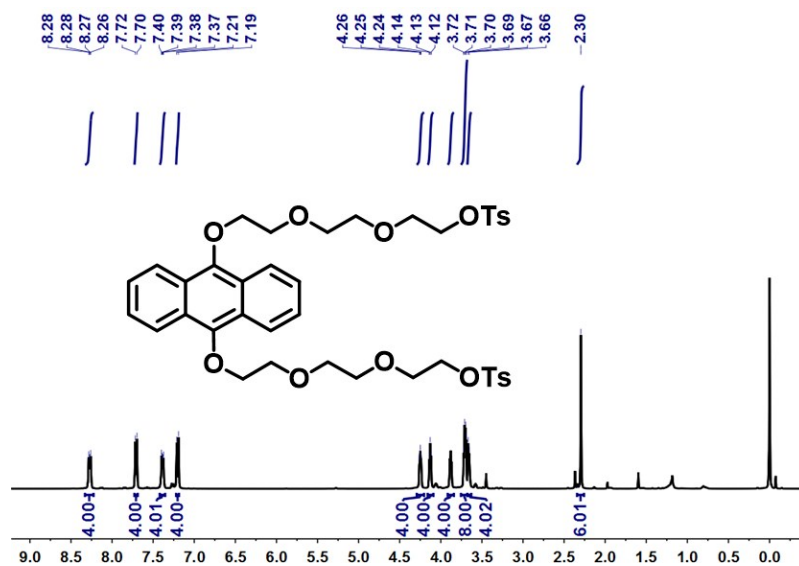

**Figure S14.** <sup>1</sup>H NMR spectrum of compound **2** in CDCl<sub>3</sub>.

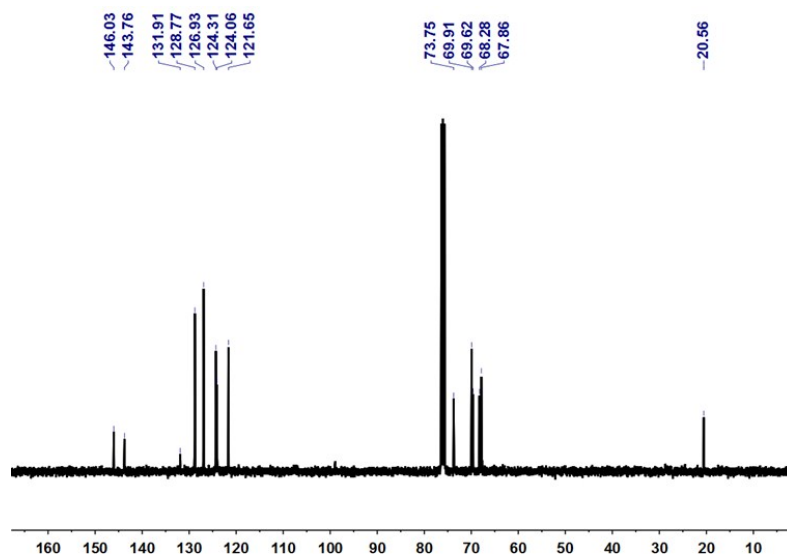

Figure S15.  $^{13}\text{C}$  NMR spectrum of compound **2** in  $\text{CDCl}_3$ .

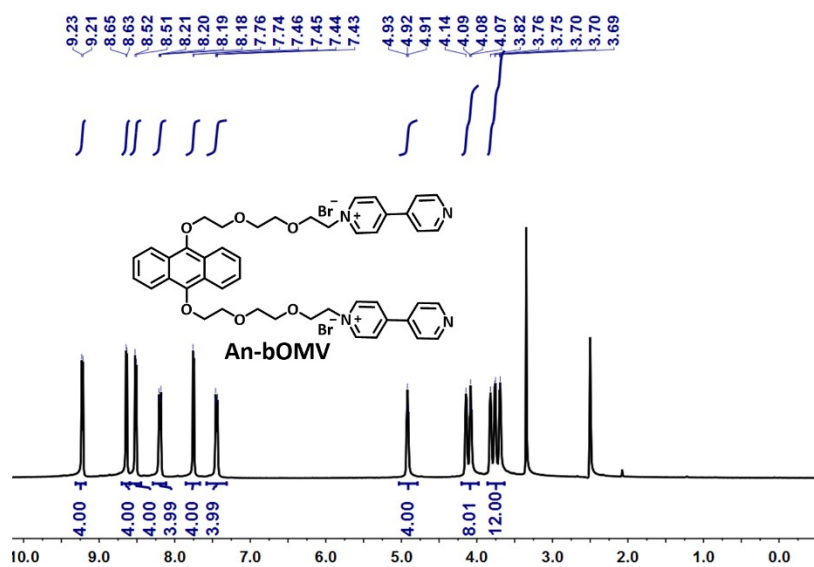

Figure S16.  $^1\text{H}$  NMR spectrum of compound **An-bOMV** in  $\text{DMSO}-d_6$ .

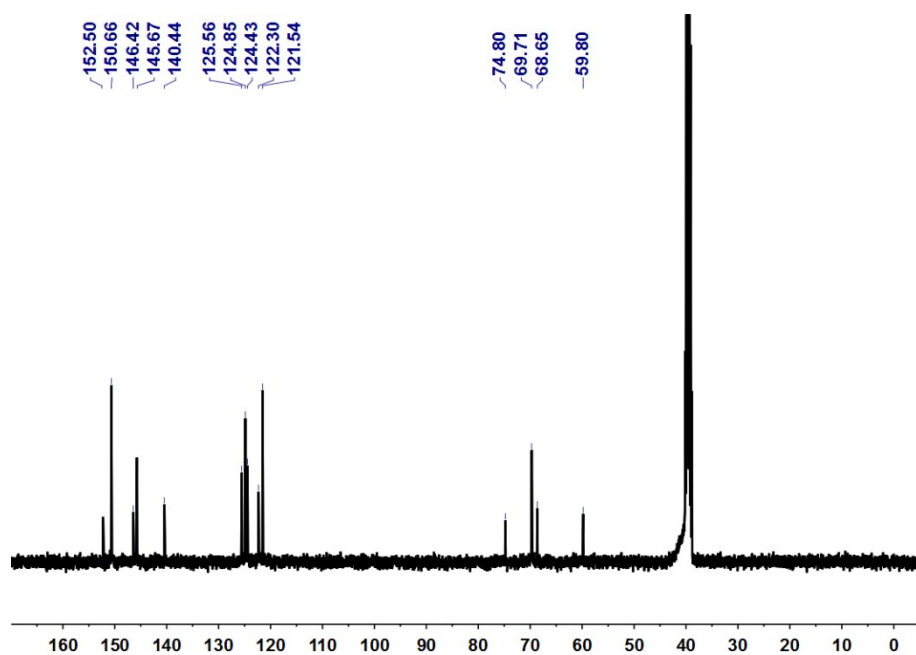

**Figure S17.**  $^{13}\text{C}$  NMR spectrum of compound An-bOMV in  $\text{DMSO-}d_6$ .

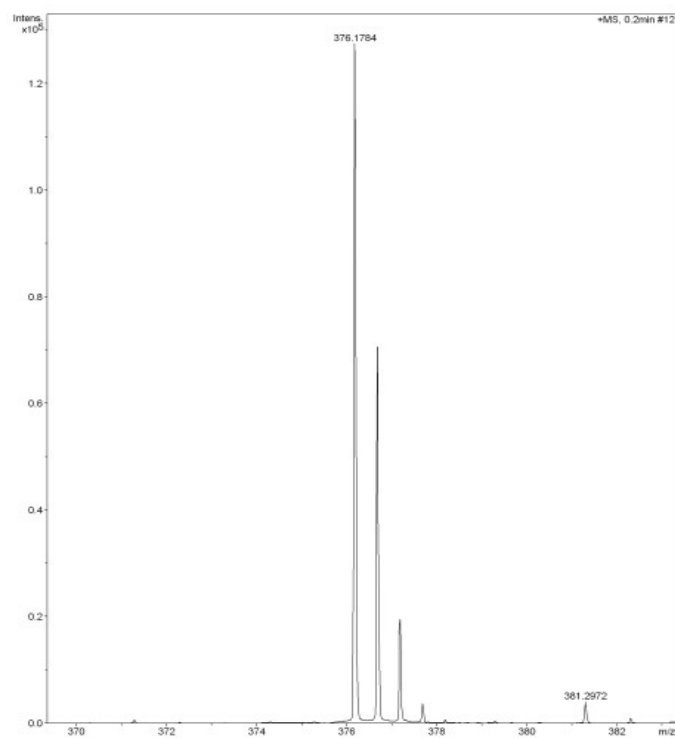

**Figure S18.** HR-ESI-MS spectrum of compound An-bOMV.

## 7. Supporting References

- 1 D. L. Mohler and G. Shen, *Org. Biomol. Chem.*, 2006, **4**, 2082–2087.
- 2 D. Arian, L. Kovbasyuk and A. Mokhir, *J. Am. Chem. Soc.*, 2011, **133**, 3972–3980.
- 3 Z.-J. Zhang, H.-Y. Zhang, L. Chen and Y. Liu, *J. Org. Chem.*, 2011, **76**, 8270–8276.
